# Supplementary material
Source: PubMed Central journal article supplement (PMC5627152)
Supplement: mmc1.pdf [file mmc1.pdf]

**Biophysical Journal, Volume 113**

**Supplemental Information**

**Disruption of Magnetic Compass Orientation in Migratory Birds by Radiofrequency Electromagnetic Fields**

**Hamish G. Hiscock, Henrik Mouritsen, David E. Manolopoulos, and P.J. Hore**

# SUPPLEMENTARY INFORMATION

---

## **Disruption of magnetic compass orientation in migratory birds by radiofrequency electromagnetic fields**

H. G. Hiscock,<sup>1</sup> H. Mouritsen,<sup>2,3</sup> D. E. Manolopoulos,<sup>1</sup> and P. J. Hore<sup>1,\*</sup>

<sup>1</sup>Department of Chemistry, University of Oxford, Physical & Theoretical Chemistry Laboratory, Oxford OX1 3QZ, United Kingdom

<sup>2</sup>Institut für Biologie und Umweltwissenschaften, Carl von Ossietzky Universität Oldenburg, 26111 Oldenburg, Germany

<sup>3</sup>Research Centre for Neurosensory Sciences, University of Oldenburg, 26111 Oldenburg, Germany

\*Correspondence: peter.hore@chem.ox.ac.uk

## SUPPLEMENTARY FIGURES

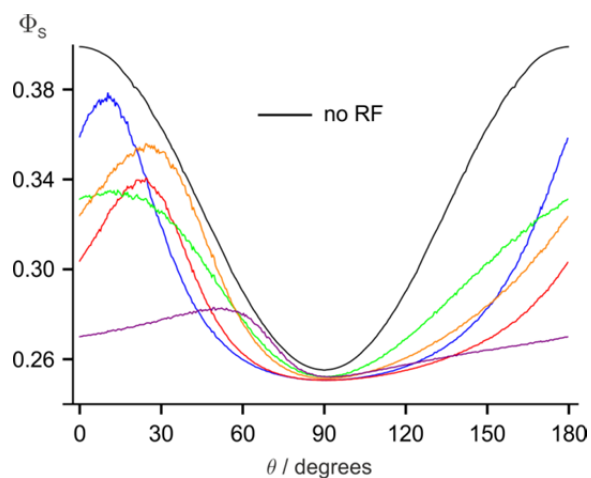

**FIGURE S1.**

FAD-Z radical pair with no exchange or dipolar interactions. The anisotropic singlet yield,  $\Phi_s(\theta)$ , calculated for five 0-10 MHz broadband fields (coloured lines); these differ because of the randomly assigned phase, direction and amplitude of each of the frequency components.

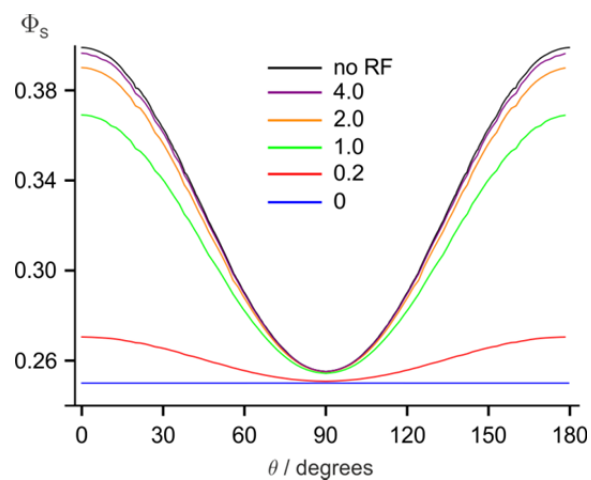

**FIGURE S2.**

FAD-Z radical pair with no exchange or dipolar interactions. The anisotropic singlet yield,  $\Phi_s(\theta)$ , in the presence of a single-frequency magnetic field with various frequency offsets from the Larmor frequency. The offsets,  $\Delta\nu$ , are given as multiples of  $\gamma_e B_1 / 2\pi$ .

## SUPPLEMENTARY TABLE

### TABLE S1.

**Summary of behavioural experiments in which test animals were exposed to time-dependent magnetic fields.** The Larmor frequency is given for the static field strength quoted in the study (column 3). The experimental conditions under which the animal could (column 4) and could not (column 5) magnetically orient are also shown.  $\nu_L$  (or  $n\nu_L$ ) in columns 4 and 5 indicates that a single-frequency field at the Larmor frequency (or a multiple thereof) was used; otherwise the frequency is given explicitly. A frequency range denotes a broadband noise condition.  $B_1$  is the 'strength' of the radiofrequency field as given in the study. Where no  $B_1$  is given, the study provides an intensity spectrum of the time-dependent field.

| Study                         | Test animal        | Larmor frequency ( $\nu_L$ ) | Oriented RF condition                                                                                                      | Disoriented RF condition                                                                                |
|-------------------------------|--------------------|------------------------------|----------------------------------------------------------------------------------------------------------------------------|---------------------------------------------------------------------------------------------------------|
| Ritz <i>et al.</i> 2004       | European robin     | 1.315 MHz                    | 7 MHz ( $B_1 = 470$ nT) parallel to static field                                                                           | 7 MHz ( $B_1 = 470$ nT) oriented $24^\circ$ and $48^\circ$ to static field, 0.1–10 MHz ( $B_1 = 85$ nT) |
| Thalau <i>et al.</i> 2005     | European robin     | 1.315 MHz                    | $\nu_L$ ( $B_1 = 485$ nT) parallel to static field                                                                         | $\nu_L$ ( $B_1 = 485$ nT) oriented $24^\circ$ to static field                                           |
| Thalau <i>et al.</i> 2006     | Ansell's mole rat  | 1.315 MHz                    | 0.1-10 MHz ( $B_1 = 85$ nT) and $\nu_L$ ( $B_1 = 4800$ nT)                                                                 |                                                                                                         |
| Ritz <i>et al.</i> 2009       | European robin     | 1.315 MHz and 2.63 MHz       | $\nu = 0.5 \nu_L$ and $2 \nu_L$ ( $B_1 = 15$ nT)                                                                           | $\nu_L$ ( $B_1 = 15$ nT) for static field strengths $47 \mu\text{T}$ , $94 \mu\text{T}$                 |
| Keary <i>et al.</i> 2009      | Zebra finch        | 1.204 MHz                    |                                                                                                                            | 1.156 MHz ( $B_1 = 470$ nT) in $43 \mu\text{T}$ field                                                   |
| Vácha <i>et al.</i> 2009      | American cockroach | 1.2 MHz                      | 7 MHz ( $B_1 = 44$ nT)                                                                                                     | $\nu_L$ ( $12$ nT $< B_1 < 18$ nT); $2 \nu_L$ ( $18$ nT $< B_1 < 44$ nT)                                |
| Winklhofer <i>et al.</i> 2013 | European robin     | 0.112 MHz                    |                                                                                                                            | 1.315 MHz ( $B_1 = 480$ nT) in $4 \mu\text{T}$ field                                                    |
| Engels <i>et al.</i> 2014     | European robin     | 1.363 MHz                    | Weak noise field control                                                                                                   | 20-450 kHz, 0.6-3 MHz, 2-9 MHz and background "electrosmog"                                             |
| Kavokin <i>et al.</i> 2014    | Garden warbler     | 1.4 MHz                      |                                                                                                                            | $\nu_L$ ( $B_1 = 190$ nT)                                                                               |
| Wiltshko <i>et al.</i> 2015   | European robin     | 1.315 MHz                    | No RF after pre-exposure to $\nu_L$ ( $B_1 = 15$ nT)                                                                       | 7 MHz ( $B_1 = 480$ nT) and $\nu_L$ ( $B_1 = 15$ nT) after pre-exposure                                 |
| Landler <i>et al.</i> 2015    | Snapping turtle    | 1.43 MHz                     | Control group, $\nu_L$ ( $B_1 = 30$ – $52$ nT) after pre-exposure (opposite orientation to control)                        | Pre-exposed to RF, tested in absence of RF and vice versa. $\nu_L$ ( $B_1 = 30$ – $52$ nT)              |
| Malkemper <i>et al.</i> 2015  | Wood mouse         | 1.33 MHz                     | $\nu_L$ ( $B_1 = 785$ – $1260$ nT) same as control, 0.9-5.0 MHz ( $B_1 = 25$ - $100$ nT) shifted orientation by $90^\circ$ |                                                                                                         |
| Schwarze <i>et al.</i> 2016   | European robin     | 1.363 MHz                    | $\nu_L$ ( $B_1 = 48$ nT)                                                                                                   | 2 kHz–9 MHz                                                                                             |
